# Supplementary material
Source: MDPI journal article supplement (https://www.mdpi.com/2227-9717/5/4/79)
Supplement: s1 [file s1]

# Supplementary Materials: Mathematical Modeling of Tuberculosis Granuloma Activation

Steve M. Ruggiero, Minu R. Pilvankar, and Ashlee N. Ford Versypt

The equations (1)–(4) for TB granuloma activation in the paper are combined with the immune response model developed in [1], which included the following equations (S1)–(S16) to track the populations of

- macrophages
  - resting macrophages,  $M_R$
  - infected macrophages,  $M_I$
  - activated macrophages,  $M_A$
- CD4+ T cells
  - Th0 cells,  $T_0$
  - Th1 cells,  $T_1$
  - Th2 cells,  $T_2$
- CD8+ T cells
  - T80 cells,  $T_{80}$
  - T8 cells,  $T_8$
  - TC cells,  $T_c$
- bacteria
  - intracellular bacteria contained inside of infected macrophages,  $B_I$
  - extracellular bacteria located inside the granuloma but outside of any cells,  $B_E$  (note that in [1] the only source of  $B_E$  is the  $B_{E,IR}$  contribution from the immune response, whereas the model developed in the present work also includes a contribution  $B_{E,L}$  from the bacterial leakage)
  - total bacteria,  $B_T = B_E + B_I$

and concentrations of

- cytokines
  - TNF- $\alpha$ ,  $F_a$
  - IFN- $\gamma$ ,  $I_\gamma$
  - IL-4,  $I_4$
  - IL-10,  $I_{10}$
  - IL-12,  $I_{12}$

with the parameters defined in Table S1:

$$\begin{aligned} \frac{dM_R}{dt} = & sr_M + \alpha_{4A}(M_A + \omega_2 M_I) + sr_{4B} \frac{F_a}{F_a + f_8 I_{10} + s_{4b}} \\ & - k_2 M_R \frac{B_E}{B_E + c_9} - k_3 M_R \frac{I_\gamma}{I_\gamma + f_1 I_4 + s_1} \frac{B_T + \beta F_\alpha}{B_T + \beta F_\alpha + c_8} - \mu_{MR} M_R \end{aligned} \quad (S1)$$

$$\begin{aligned} \frac{dM_I}{dt} = & k_2 M_R \frac{B_E}{B_E + c_9} - k_{17} M_I \frac{B_I^2}{B_I^2 + (NM_I)^2} \\ & - k_{14A} M_I \frac{(T_c + \omega_3 T_1)/M_I}{(T_c + \omega_3 T_1)/M_I + c_4} - k_{14B} M_I \frac{F_\alpha}{F_\alpha + f_9 I_{10} + s_{4B}} \\ & - k_{52} M_I \frac{(T_c(T_1/(T_1 + c_{T1})) + \omega_1 T_1)/M_I}{(T_c(T_1/(T_1 + c_{T1})) + \omega_1 T_1)/M_I + c_{52}} - \mu_{MI} M_I \end{aligned} \quad (S2)$$

$$\frac{dM_A}{dt} = k_3 M_R \frac{I_\gamma}{I_\gamma + f_1 I_4 + s_1} \frac{B_T + \beta F_\alpha}{B_T + \beta F_\alpha + c_8} - k_4 M_A \frac{I_{10}}{I_{10} + s_8} - \mu_{M_A} M_A \quad (S3)$$

$$\begin{aligned} \frac{dT_0}{dt} = & \alpha_{1A}(M_A + \omega_2 M_I) + sr_{1B} \frac{F_a}{F_a + f_8 I_{10} + s_{4b2}} + \alpha_2 T_0 \frac{M_A}{M_A + c_{15}} \\ & - k_6 I_{12} T_0 \frac{I_\gamma}{I_\gamma + (f_1 I_4 + f_7 I_{10}) + s_1} - k_7 T_0 \frac{I_4}{I_4 + f_2 I_\gamma + s_2} - \mu_{T_0} T_0 \end{aligned} \quad (S4)$$

$$\begin{aligned} \frac{dT_1}{dt} = & \alpha_{3A}(M_A + \omega_2 M_I) + sr_{3B} \frac{F_a}{F_a + f_8 I_{10} + s_{4b1}} \\ & + k_6 I_{12} T_0 \frac{I_\gamma}{I_\gamma + (f_1 I_4 + f_7 I_{10}) + s_1} - \mu_{T_\gamma} \frac{I_\gamma}{I_\gamma + c} T_1 M_A - \mu_{T_1} T_1 \end{aligned} \quad (S5)$$

$$\begin{aligned} \frac{dT_2}{dt} = & \alpha_{3A2}(M_A + \omega_2 M_I) + sr_{3B2} \frac{F_a}{F_a + f_8 I_{10} + s_{4b1}} \\ & + k_7 T_0 \frac{I_4}{I_4 + f_2 I_\gamma + s_2} - \mu_{T_2} T_2 \end{aligned} \quad (S6)$$

$$\begin{aligned} \frac{dT_{80}}{dt} = & \alpha_{1A}(M_A + \omega_2 M_I) + sr_{1B} \frac{F_a}{F_a + f_8 I_{10} + s_{4b2}} + \alpha_2 T_{80} \frac{M_A}{M_A + c_{15}} \\ & - k_6 I_{12} T_{80} \frac{I_\gamma}{I_\gamma + (f_1 I_4 + f_7 I_{10}) + s_1} - \mu_{T_{80}} T_{80} \end{aligned} \quad (S7)$$

$$\begin{aligned} \frac{dT_8}{dt} = & m\alpha_{3Ac}(M_A + \omega_2 M_I) + msr_{3Bc} \frac{F_a}{F_a + f_8 I_{10} + s_{4b1}} \\ & + mk_6 I_{12} T_{80} \frac{I_\gamma}{I_\gamma + (f_1 I_4 + f_7 I_{10}) + s_1} - \mu_{T_c \gamma} \frac{I_\gamma}{I_\gamma + c} T_8 M_A - \mu_{T_8} T_8 \end{aligned} \quad (S8)$$

$$\begin{aligned} \frac{dT_c}{dt} = & m\alpha_{3Ac}(M_A + \omega_2 M_I) + msr_{3Bc} \frac{F_a}{F_a + f_8 I_{10} + s_{4b1}} \\ & + mk_6 I_{12} T_{80} \frac{I_\gamma}{I_\gamma + (f_1 I_4 + f_7 I_{10}) + s_1} - \mu_{T_c \gamma} \frac{I_\gamma}{I_\gamma + c} T_c M_A - \mu_{T_c} T_c \end{aligned} \quad (S9)$$

$$\begin{aligned} \frac{dF_\alpha}{dt} = & \alpha_{30} M_I + \alpha_{30} M_A \frac{I_\gamma + \beta_2 B_T}{I_\gamma + \beta_2 B_T + (f_1 I_4 + f_7 I_{10}) + s_{10}} \\ & + \alpha_{32} T_1 + \alpha_{33}(T_c + T_8) - \mu_{F_\alpha} F_\alpha \end{aligned} \quad (S10)$$

$$\begin{aligned} \frac{dI_\gamma}{dt} = & s_g \frac{B_T}{B_T + c_{10}} \frac{I_{12}}{I_{12} + s_7} + \alpha_{5A} T_1 \frac{M_A}{M_A + c_{5A}} + \alpha_{5B} T_8 \frac{M_A}{M_A + c_{5B}} \\ & + \alpha_{5c} M_I + \alpha_7 T_0 \frac{I_{12}}{I_{12} + f_4 I_{10} + s_4} + \alpha_7 T_{80} \frac{I_{12}}{I_{12} + f_4 I_{10} + s_4} - \mu_{I_\gamma} I_\gamma \end{aligned} \quad (S11)$$

$$\frac{dI_4}{dt} = \alpha_{11} T_0 + \alpha_{12} T_2 - \mu_{I_4} I_4 \quad (S12)$$

$$\frac{dI_{10}}{dt} = \delta_7 M_A \frac{s_6}{I_{10} + f_6 I_\gamma + s_6} + \alpha_{16} T_1 + \alpha_{17} T_2 + \alpha_{18} (T_8 + T_c) - \mu_{110} I_{10} \quad (\text{S13})$$

$$\frac{dI_{12}}{dt} = s_{12} \frac{B_T}{B_T + c_{230}} + \alpha_{23} M_R \frac{B_T}{B_T + c_{23}} + \alpha_8 M_A \frac{s}{s + I_{10}} - \mu_{112} I_{12} \quad (\text{S14})$$

$$\begin{aligned} \frac{dB_I}{dt} = & \alpha_{19} B_I \left( 1 - \frac{B_I^2}{B_I^2 + (NM_I)^2} \right) + k_2 \frac{N}{2} M_R \frac{B_E}{B_E + c_9} \\ & - k_{17} N M_I \frac{B_I^2}{B_I^2 + (NM_I)^2} - k_{14A} N M_I \frac{(T_c + \omega_3 T_1)/M_I}{(T_c + \omega_3 T_1)/M_I + c_4} \\ & - k_{14B} N M_I \frac{F_\alpha}{F_\alpha + f_9 I_{10} + s_{4b}} \\ & - k_{52} N M_I \frac{(T_c(T_1/(T_1 + c_{T1})) + \omega_1 T_1)/M_I}{(T_c(T_1/(T_1 + c_{T1})) + \omega_1 T_1)/M_I + c_{52}} - \mu_I B_I \end{aligned} \quad (\text{S15})$$

$$\begin{aligned} \frac{dB_E}{dt} = \frac{dB_{E,IR}}{dt} = & \alpha_{20} B_E + \mu_I B_I - k_{15} M_A B_E - k_{18} M_R B_E + k_{17} N M_I \frac{B_I^2}{B_I^2 + (NM_I)^2} \\ & - k_2 \frac{N}{2} M_R \frac{B_E}{B_E + c_9} + k_{14A} N N_{fracc} M_I \frac{(T_c + \omega_3 T_1)/M_I}{(T_c + \omega_3 T_1)/M_I + c_4} \\ & + k_{14B} N N_{fraca} M_I \frac{F_\alpha}{F_\alpha + f_9 I_{10} + s_{4b}} \end{aligned} \quad (\text{S16})$$

For detailed descriptions of the derivation of (S1)–(S16), see [1] and [2]. Diagrams of the kinetic processes in the immune response model for macrophages, T cells, and bacteria are illustrated in [2].

**Table S1.** Parameters used in immune response model from [1]

| Parameter      | Description                               | Value                 | Units                                                                 |
|----------------|-------------------------------------------|-----------------------|-----------------------------------------------------------------------|
| $\alpha_{5a}$  | Production of $I_\gamma$ by $T_1$         | 50                    | $\text{pg} \cdot T_1^{-1} \cdot \text{day}^{-1}$                      |
| $\alpha_{30}$  | Production of $F_\alpha$ by $M_I$         | $3 \times 10^{-3}$    | $\text{pg} \cdot \text{ml}^{-1} \cdot M_I^{-1} \cdot \text{day}^{-1}$ |
| $\alpha_{5c}$  | Production of $I_\gamma$ by $M_I$         | 0.03                  | $\text{pg} \cdot \text{ml}^{-1} \cdot M_I^{-1}$                       |
| $\alpha_{4a}$  | Recruitment of $M_R$                      | $5 \times 10^{-3}$    | $\text{day}^{-1}$                                                     |
| $\alpha_{23}$  | Production of $I_{12}$ by $M_R$           | $2 \times 10^{-4}$    | $\text{pg} \cdot \text{ml}^{-1} \cdot M_R^{-1}$                       |
| $\alpha_{5b}$  | Production of $I_\gamma$ by $T_8$         | 50                    | $\text{pg} \cdot T_8^{-1} \cdot \text{day}^{-1}$                      |
| $\alpha_{18}$  | Production of $I_{10}$ by $T_c$ and $T_8$ | 0.02                  | $\text{pg} \cdot \text{CD8}^{-1} \cdot \text{day}^{-1}$               |
| $\alpha_{3a2}$ | Recruitment of $T_2$ by chemokines        | $1 \times 10^{-3}$    | $\text{day}^{-1}$                                                     |
| $\alpha_{3ac}$ | Recruitment of $T_c$ and $T_8$            | $3 \times 10^{-3}$    | $\text{day}^{-1}$                                                     |
| $\alpha_{31}$  | Production of $F_\alpha$ by $M_A$         | $4 \times 10^{-3}$    | $\text{pg} \cdot \text{ml}^{-1} \cdot M_A^{-1} \cdot \text{day}^{-1}$ |
| $\alpha_{1a}$  | Recruitment of $T_0$                      | $4 \times 10^{-3}$    | $\text{day}^{-1}$                                                     |
| $\alpha_{32}$  | Production of $F_\alpha$ by $T_1$         | $8.16 \times 10^{-4}$ | $\text{pg} \cdot \text{ml}^{-1} \cdot T_1^{-1} \cdot \text{day}^{-1}$ |
| $\alpha_{33}$  | Production of $F_\alpha$ by $T_8$         | $6 \times 10^{-5}$    | $\text{pg} \cdot \text{ml}^{-1} \cdot T_8^{-1} \cdot \text{day}^{-1}$ |
| $\alpha_{3a}$  | Recruitment of $T_1$                      | $5 \times 10^{-3}$    | $\text{day}^{-1}$                                                     |
| $sr_{3b2}$     | $F_\alpha$ dependent recruitment of $T_2$ | $1 \times 10^3$       | $\text{day}^{-1}$                                                     |
| $sr_{4b}$      | $F_\alpha$ dependent recruitment of $M_R$ | $2 \times 10^4$       | $M_R \cdot \text{day}^{-1}$                                           |
| $sr_{1b}$      | $F_\alpha$ dependent recruitment of $T_0$ | $2 \times 10^5$       | $T_0 \cdot \text{day}^{-1}$                                           |

**Table S1.** Parameters used in immune response model from [1]

| Parameter        | Description                                                               | Value              | Units                                                  |
|------------------|---------------------------------------------------------------------------|--------------------|--------------------------------------------------------|
| $sr_{3b}$        | $F_\alpha$ dependent recruitment of $T_1$                                 | $2 \times 10^4$    | $T_0 \cdot \text{day}^{-1}$                            |
| $sr_{3bc}$       | $F_\alpha$ dependent recruitment of $T_c$ and $T_8$                       | $8 \times 10^4$    | $T \cdot \text{day}^{-1}$                              |
| $f_9$            | Ratio adjustment of $F_\alpha$ and $I_{10}$                               | 50                 | -                                                      |
| $f_7$            | Effect of $I_{10}$ on $I_\gamma$ induced $T_0$ differentiation to $T_1$   | 1                  | -                                                      |
| $f_8$            | Ratio adjustment of $F_\alpha$ and $I_{10}$ on $M_R$ recruitment          | 1                  | -                                                      |
| $s_{4b1}$        | Half-sat constant of $F_\alpha$ on $T_1$ recruitment                      | 165                | $\text{pg} \cdot \text{ml}^{-1}$                       |
| $s_{4b2}$        | Half-sat constant of $F_\alpha$ on $T_0$ recruitment                      | 450                | $\text{pg} \cdot \text{ml}^{-1}$                       |
| $s_{4b}$         | Half-sat constant of $F_\alpha$ on $M_R$ recruitment                      | 200                | $\text{pg} \cdot \text{ml}^{-1} \cdot \text{day}^{-1}$ |
| $\beta_2$        | Scaling factor of $B_T$ for $F_\alpha$ production by $M_A$                | $10^{-3}$          | -                                                      |
| $\beta$          | Scaling factor of $F_\alpha$ for $M_R$ activation to $M_A$                | 100                | $B_T \cdot \text{pg}^{-1}$                             |
| $c$              | Half-sat constant of $I_\gamma$ on $T_1$ death                            | $1.1 \times 10^3$  | $\text{pg} \cdot \text{ml}^{-1}$                       |
| $c_c$            | Half-sat constant of $I_\gamma$ on $T_c$ and $T_8$ death                  | 550                | $\text{pg} \cdot \text{ml}^{-1}$                       |
| $c_{52}$         | Half-sat constant of $T_1$ on $T_c$ cytotoxicity                          | 50                 | $T_c$                                                  |
| $c_{T1}$         | Half-sat constant of $T_c$ on T-cell induced $M_I$ killing                | 10                 | $T_1$                                                  |
| $c_{5a}$         | Half-sat constant of $M_A$ on $I_\gamma$ production by $T_1$              | $7 \times 10^3$    | $M_A \cdot \text{ml}^{-1}$                             |
| $c_T$            | Half-sat constant of $B_T$ on $F_\alpha$ production by $T_1$ and $T_8$    | $1 \times 10^4$    | $B_T$                                                  |
| $c_{5b}$         | Half-sat constant of $M_A$ on $I_\gamma$ production $T_8$                 | $7 \times 10^3$    | $M_A \cdot \text{ml}^{-1}$                             |
| $c_{230}$        | Half-sat constant of $B_T$ on $I_{12}$ production by dendritic cells      | $1 \times 10^3$    | $B_T \cdot \text{ml}$                                  |
| $c_{23}$         | Half-sat constant of $B_T$ on $I_{12}$ production by $M_R$                | $5 \times 10^3$    | $B_T \cdot \text{ml}$                                  |
| $c_4$            | Half-sat constant of $\frac{T_c+T_1}{M_I}$ on $M_I$ apoptosis             | 40                 | $T \cdot M_I^{-1}$                                     |
| $\omega_3$       | Max percent contribution of $T_1$ to Fas-FasL apoptosis of $M_I$          | 0.4                | -                                                      |
| $\omega_2$       | Max percent contribution of $M_I$ produced cytokines to $M_R$ recruitment | 0.15               | -                                                      |
| $\omega_1$       | Max percent contribution of $T_1$ to cytotoxicity                         | 0.5                | -                                                      |
| $m$              | Percent overlap of $T_c$ and $T_8$                                        | 0.6                | -                                                      |
| $\mu_{T\gamma}$  | Rate of $I_\gamma$ induced apoptosis of $T_1$                             | $1 \times 10^{-4}$ | $M_A^{-1} \cdot \text{day}^{-1}$                       |
| $\mu_{Tc\gamma}$ | Rate of $I_\gamma$ induced apoptosis of $T_c$ and $T_8$                   | $1 \times 10^{-4}$ | $M_A^{-1} \cdot \text{day}^{-1}$                       |
| $\mu_{T8}$       | Death rate of $T_8$                                                       | 0.33               | $\text{day}^{-1}$                                      |
| $\mu_{Tc}$       | Death rate of $T_c$                                                       | 0.33               | $\text{day}^{-1}$                                      |
| $\mu_{T80}$      | Death rate of $T_{80}$                                                    | 0.33               | $\text{day}^{-1}$                                      |
| $\mu_I$          | $B_I$ turnover to $B_{E'}$ , primarily due to $M_I$ death                 | $4 \times 10^{-3}$ | $\text{day}^{-1}$                                      |
| $\mu_{TNF}$      | Decay rate of $F_\alpha$                                                  | 1.11               | $\text{day}^{-1}$                                      |
| $k_{14a}$        | Apoptosis of $M_I$ induced by Fas-FasL                                    | 0.1                | $\text{day}^{-1}$                                      |
| $k_{14b}$        | Apoptosis of $M_I$ induced by $F_\alpha$                                  | 0.1                | $\text{day}^{-1}$                                      |
| $k_{52}$         | Cytotoxic killing of $M_I$                                                | 0.5                | $\text{day}^{-1}$                                      |
| $s_{10}$         | Half-sat constant of $I_\gamma$ on $F_\alpha$ production by $M_A$         | 80                 | $\text{pg} \cdot \text{ml}^{-1}$                       |
| $s_{12}$         | Production of $I_{12}$ by dendritic cells                                 | $1 \times 10^3$    | $\text{pg} \cdot \text{ml}^{-1} \cdot \text{day}^{-1}$ |
| $s$              | Downregulation by $I_{10}$ on $I_{12}$ production by $M_A$                | 10                 | $\text{pg} \cdot \text{ml}^{-1}$                       |
| $\delta_7$       | Production of $I_{10}$ by $M_A$                                           | 0.01               | $\text{pg} \cdot \text{ml}^{-1} \cdot M_A^{-1}$        |
| $N_{fraca}$      | Average number of bacteria released from $M_I$ apoptosis by $F_\alpha$    | 0.5                | -                                                      |
| $N_{fracc}$      | Average number of bacteria released from $M_I$ apoptosis by Fas-FasL      | 0.1                | -                                                      |

Table S1. Parameters used in immune response model from [1]

| Parameter        | Description                                                                     | Value                | Units                                                  |
|------------------|---------------------------------------------------------------------------------|----------------------|--------------------------------------------------------|
| $\alpha_{20}$    | Growth rate of $B_E$                                                            | 0.05                 | $\text{day}^{-1}$                                      |
| $\alpha_{19}$    | Growth rate of $B_I$                                                            | 0.4                  | $\text{day}^{-1}$                                      |
| $\alpha_{12}$    | Production of $I_4$ by $T_2$                                                    | $1 \times 10^{-3}$   | $\text{pg} \cdot T_2^{-1} \cdot \text{day}^{-1}$       |
| $\alpha_{11}$    | Production of $I_4$ by $T_0$                                                    | $5 \times 10^{-4}$   | $\text{pg} \cdot T_0^{-1} \cdot \text{day}^{-1}$       |
| $\alpha_{17}$    | Production of $I_{10}$ by $T_2$                                                 | 0.06                 | $\text{pg} \cdot T_2^{-1} \cdot \text{day}^{-1}$       |
| $\alpha_8$       | Production of $I_{12}$ by $M_A$                                                 | $8 \times 10^{-4}$   | $\text{pg} \cdot M_A^{-1} \cdot \text{day}^{-1}$       |
| $\alpha_7$       | Production of $I_\gamma$ by $T_0$                                               | 0.03                 | $\text{pg} \cdot \text{ml}^{-1} \cdot T_0^{-1}$        |
| $\alpha_{16}$    | Production of $I_{10}$ by $T_1$                                                 | $2 \times 10^{-3}$   | $\text{pg} \cdot T_1^{-1} \cdot \text{day}^{-1}$       |
| $\alpha_2$       | Max growth rate of $T_0$                                                        | $5 \times 10^{-3}$   | $\text{day}^{-1}$                                      |
| $sr_m$           | Recruitment rate of $M_R$                                                       | $1 \times 10^3$      | $M_R \cdot \text{day}^{-1}$                            |
| $f_6$            | Ratio adjustment of $I_{10}$ and $I_\gamma$ on $I_{10}$ production              | $2.5 \times 10^{-2}$ | -                                                      |
| $f_4$            | Ratio adjustment of $I_{10}$ and $I_{12}$ on $I_\gamma$ production              | 2                    | -                                                      |
| $f_2$            | Ratio adjustment of $I_\gamma$ and $I_4$ on $T_0$ differentiation to $T_2$      | 1                    | -                                                      |
| $f_1$            | Ratio adjustment of $I_4$ and $I_\gamma$                                        | 200                  | -                                                      |
| $s_2$            | Half-sat constant of $I_4$ on $T_0$ differentiation to $T_2$                    | 5                    | $\text{pg} \cdot \text{ml}^{-1}$                       |
| $s_6$            | Half-sat constant of $I_{10}$ self-inhibition in production by $M_A$            | 60                   | $\text{pg} \cdot \text{ml}^{-1}$                       |
| $s_4$            | Half-sat constant of $I_{12}$ on production of $I_\gamma$ by $T_0$ and $T_{80}$ | 50                   | $\text{pg} \cdot \text{ml}^{-1}$                       |
| $s_7$            | Half-sat constant of $I_{12}$ on $I_\gamma$ production by NK cells              | 40                   | $\text{pg} \cdot \text{ml}^{-1}$                       |
| $s_1$            | Half-sat constant of $I_\gamma$ on $M_R$ activation to $M_A$                    | $7 \times 10^3$      | $\text{pg} \cdot \text{ml}^{-1}$                       |
| $s_8$            | Half-sat constant of $I_{10}$ on $M_A$ deactivation                             | 1                    | $\text{pg} \cdot \text{ml}^{-1}$                       |
| $c_9$            | Half-sat constant of $B_E$ on $M_R$ infection to $M_I$                          | $2 \times 10^6$      | $B_E$                                                  |
| $c_8$            | Half-sat constant of $B_T$ on $M_R$ activation to $M_A$                         | $2 \times 10^5$      | $B_T \cdot \text{ml}^{-1}$                             |
| $c_{15}$         | Half-sat constant of $M_A$ on $I_\gamma$ production by $T_1$                    | $2 \times 10^5$      | $M_A$                                                  |
| $c_{10}$         | Half-sat constant of $B_T$ on $I_\gamma$ production by NK cells                 | $1 \times 10^3$      | $B_T \cdot \text{ml}^{-1}$                             |
| $\mu_{MR}$       | Death rate of $M_R$                                                             | $3.3 \times 10^{-3}$ | $\text{day}^{-1}$                                      |
| $\mu_{MI}$       | Death rate of $M_I$                                                             | $1.1 \times 10^{-3}$ | $\text{day}^{-1}$                                      |
| $\mu_{MA}$       | Death rate of $M_A$                                                             | 0.07                 | $\text{day}^{-1}$                                      |
| $\mu_{I_\gamma}$ | Decay rate of $I_\gamma$                                                        | 2.16                 | $\text{day}^{-1}$                                      |
| $\mu_{I_4}$      | Decay rate of $I_4$                                                             | 2.77                 | $\text{day}^{-1}$                                      |
| $\mu_{I_{10}}$   | Decay rate of $I_{10}$                                                          | 5                    | $\text{day}^{-1}$                                      |
| $\mu_{I_{12}}$   | Decay rate of $I_{12}$                                                          | 1.19                 | $\text{day}^{-1}$                                      |
| $\mu_{T_2}$      | Death rate of $T_2$                                                             | 0.33                 | $\text{day}^{-1}$                                      |
| $\mu_{T_1}$      | Death rate of $T_1$                                                             | 0.33                 | $\text{day}^{-1}$                                      |
| $\mu_{T_0}$      | Death rate of $T_0$                                                             | 0.33                 | $\text{day}^{-1}$                                      |
| $k_2$            | Rate of $M_R$ infection to $M_I$                                                | 0.4                  | $\text{day}^{-1}$                                      |
| $k_3$            | Rate of $M_R$ activation to $M_A$                                               | 0.05                 | $\text{day}^{-1}$                                      |
| $k_{17}$         | Max death rate of $M_I$ due to $B_I$                                            | 0.02                 | $\text{day}^{-1}$                                      |
| $k_4$            | Rate of $M_A$ deactivation by $I_{10}$                                          | 0.08                 | $\text{day}^{-1}$                                      |
| $k_6$            | Max rate of $T_0$ differentiation to $T_1$                                      | $5 \times 10^{-3}$   | $\text{ml} \cdot \text{pg}^{-1} \cdot \text{day}^{-1}$ |
| $k_7$            | Max rate of $T_0$ differentiation to $T_2$                                      | 0.02                 | $\text{ml} \cdot \text{pg}^{-1} \cdot \text{day}^{-1}$ |
| $k_{18}$         | Rate of $B_E$ killing by $M_R$                                                  | $5 \times 10^{-9}$   | $\text{ml} \cdot M_R^{-1} \cdot \text{day}^{-1}$       |

**Table S1.** Parameters used in immune response model from [1]

| Parameter | Description                          | Value                 | Units                                                  |
|-----------|--------------------------------------|-----------------------|--------------------------------------------------------|
| $k_{15}$  | Rate of $B_E$ killing by $M_A$       | $1.25 \times 10^{-7}$ | $\text{ml} \cdot M_A^{-1} \cdot \text{day}^{-1}$       |
| $s_g$     | Production of $I_\gamma$ by NK cells | 100                   | $\text{pg} \cdot \text{ml}^{-1} \cdot \text{day}^{-1}$ |
| $N$       | $B_I$ carrying capacity of $M_I$     | 10                    | $B_I \cdot M_I$                                        |

1. Sud, D.; Bigbee, C.; Flynn, J.L.; Kirschner, D.E. Contribution of CD8+ T cells to control of Mycobacterium tuberculosis infection. *J. Immunol.* **2006**, *176*, 4296-4314.
2. Marino, S.; Sud, D.; Plessner, H.; Lin, P.L.; Chan, J.; Flynn, J.L.; Kirschner, D.E. Differences in reactivation of tuberculosis induced from anti-TNF treatments are based on bioavailability in granulomatous tissue, *PLoS Comput. Biol.* **2007**, *3*, e194.
